# Supplementary material for: Rapid high resolution T1 mapping as a marker of brain development: Normative ranges in key regions of interest
Source: PubMed Central journal article supplement (PMC6002025; doi:10.1371/journal.pone.0198250), 2018-06-14
Supplement: pone.0198250.s001.pdf [file pone.0198250.s001.pdf]

**Table of contents**

\\Skyra

Sk\_Neuro

A Cerveau

Sequences T1

[mp2rage\\_morpho\\_wip900D](#)

\\Skyra\Sk\_Neuro\A Cerveau\Sequences T1\mp2rage\_morpho\_wip900D

TA: 8:22 PM: REF Voxel size: 1.0×1.0×1.2 mmPAT: 3 Rel. SNR: 1.00 : tfl

**Properties**

|                                               |                    |
|-----------------------------------------------|--------------------|
| Prio recon                                    | Off                |
| Load images to viewer                         | On                 |
| Inline movie                                  | Off                |
| Auto store images                             | On                 |
| Load images to stamp segments                 | Off                |
| Load images to graphic segments               | Off                |
| Auto open inline display                      | Off                |
| Auto close inline display                     | Off                |
| Start measurement without further preparation | Off                |
| Wait for user to start                        | Off                |
| Start measurements                            | Single measurement |

**Routine**

|                    |                                            |
|--------------------|--------------------------------------------|
| Slab group         | 1                                          |
| Slabs              | 1                                          |
| Dist. factor       | 50 %                                       |
| Position           | Isocenter                                  |
| Orientation        | Sagittal                                   |
| Phase enc. dir.    | A >> P                                     |
| AutoAlign          | Head > Basis                               |
| Phase oversampling | 0 %                                        |
| Slice oversampling | 0.0 %                                      |
| Slices per slab    | 176                                        |
| FoV read           | 256 mm                                     |
| FoV phase          | 93.8 %                                     |
| Slice thickness    | 1.20 mm                                    |
| TR                 | 5000.0 ms                                  |
| TE                 | 2.9 ms                                     |
| Averages           | 1                                          |
| Concatenations     | 1                                          |
| Filter             | Distortion Corr.(3D),<br>Prescan Normalize |
| Coil elements      | HE1-4                                      |

**Contrast - Common**

|                   |             |
|-------------------|-------------|
| TR                | 5000.0 ms   |
| TE                | 2.9 ms      |
| Magn. preparation | Non-sel. IR |
| TI 1              | 700 ms      |
| TI 2              | 2500 ms     |
| Flip angle 1      | 4 deg       |
| Flip angle 2      | 5 deg       |
| Fat suppr.        | None        |
| Water suppr.      | None        |

**Contrast - Dynamic**

|                 |                  |
|-----------------|------------------|
| Averages        | 1                |
| Averaging mode  | Long term        |
| Reconstruction  | Magnitude        |
| Measurements    | 1                |
| Multiple series | Each measurement |

**Resolution - Common**

|                  |         |
|------------------|---------|
| FoV read         | 256 mm  |
| FoV phase        | 93.8 %  |
| Slice thickness  | 1.20 mm |
| Base resolution  | 256     |
| Phase resolution | 100 %   |
| Slice resolution | 100 %   |

**Resolution - Common**

|                       |     |
|-----------------------|-----|
| Phase partial Fourier | Off |
| Slice partial Fourier | Off |

**Resolution - iPAT**

|                     |            |
|---------------------|------------|
| PAT mode            | GRAPPA     |
| Accel. factor PE    | 3          |
| Ref. lines PE       | 32         |
| Accel. factor 3D    | 1          |
| Reference scan mode | Integrated |

**Resolution - Filter Image**

|                   |     |
|-------------------|-----|
| Image Filter      | Off |
| Distortion Corr.  | On  |
| Mode              | 3D  |
| Unfiltered images | Off |
| Prescan Normalize | On  |
| Unfiltered images | Off |

**Resolution - Filter Rawdata**

|                   |     |
|-------------------|-----|
| Raw filter        | Off |
| Elliptical filter | Off |

**Geometry - Common**

|                    |             |
|--------------------|-------------|
| Slab group         | 1           |
| Slabs              | 1           |
| Dist. factor       | 50 %        |
| Position           | Isocenter   |
| Orientation        | Sagittal    |
| Phase enc. dir.    | A >> P      |
| Slice oversampling | 0.0 %       |
| Slices per slab    | 176         |
| FoV read           | 256 mm      |
| FoV phase          | 93.8 %      |
| Slice thickness    | 1.20 mm     |
| TR                 | 5000.0 ms   |
| Multi-slice mode   | Single shot |
| Series             | Interleaved |
| Concatenations     | 1           |

**Geometry - AutoAlign**

|                     |              |
|---------------------|--------------|
| Slab group          | 1            |
| Position            | Isocenter    |
| Orientation         | Sagittal     |
| Phase enc. dir.     | A >> P       |
| AutoAlign           | Head > Basis |
| Initial Position    | Isocenter    |
| L                   | 0.0 mm       |
| P                   | 0.0 mm       |
| H                   | 0.0 mm       |
| Initial Rotation    | 0.00 deg     |
| Initial Orientation | Sagittal     |

**Geometry - Navigator****Geometry - Tim Planning Suite**

|                   |      |
|-------------------|------|
| Set-n-Go Protocol | Off  |
| Table position    | H    |
| Table position    | 0 mm |
| Inline Composing  | Off  |

**System - Miscellaneous**

|                     |                  |
|---------------------|------------------|
| Positioning mode    | REF              |
| Table position      | H                |
| Table position      | 0 mm             |
| MSMA                | S - C - T        |
| Sagittal            | R >> L           |
| Coronal             | A >> P           |
| Transversal         | F >> H           |
| Coil Combine Mode   | Adaptive Combine |
| Save uncombined     | Off              |
| Matrix Optimization | Off              |
| AutoAlign           | Head > Basis     |
| Coil Select Mode    | Default          |

**System - Adjustments**

|                          |          |
|--------------------------|----------|
| B0 Shim mode             | Standard |
| B1 Shim mode             | TrueForm |
| Adjust with body coil    | Off      |
| Confirm freq. adjustment | Off      |
| Assume Dominant Fat      | Off      |
| Assume Silicone          | Off      |
| Adjustment Tolerance     | Auto     |

**System - Adjust Volume**

|             |           |
|-------------|-----------|
| Position    | Isocenter |
| Orientation | Sagittal  |
| Rotation    | 0.00 deg  |
| A >> P      | 240 mm    |
| F >> H      | 256 mm    |
| R >> L      | 212 mm    |
| Reset       | Off       |

**System - pTx Volumes**

|              |          |
|--------------|----------|
| B1 Shim mode | TrueForm |
| Excitation   | Non-sel. |

**System - Tx/Rx**

|                     |                |
|---------------------|----------------|
| Frequency 1H        | 123.221863 MHz |
| Correction factor   | 1              |
| Gain                | Low            |
| Img. Scale Cor.     | 1.000          |
| Reset               | Off            |
| ? Ref. amplitude 1H | 0.000 V        |

**Physio - Signal1**

|                 |           |
|-----------------|-----------|
| 1st Signal/Mode | None      |
| TR              | 5000.0 ms |
| Concatenations  | 1         |

**Physio - Cardiac**

|                   |             |
|-------------------|-------------|
| Magn. preparation | Non-sel. IR |
| TI 1              | 700 ms      |
| TI 2              | 2500 ms     |
| Fat suppr.        | None        |
| Dark blood        | Off         |
| FoV read          | 256 mm      |
| FoV phase         | 93.8 %      |
| Phase resolution  | 100 %       |

**Physio - PACE**

|                |     |
|----------------|-----|
| Resp. control  | Off |
| Concatenations | 1   |

**Inline - Common**

|                      |     |
|----------------------|-----|
| Subtract             | Off |
| Measurements         | 1   |
| StdDev               | Off |
| Save original images | On  |

**Inline - MIP**

|                      |     |
|----------------------|-----|
| MIP-Sag              | Off |
| MIP-Cor              | Off |
| MIP-Tra              | Off |
| MIP-Time             | Off |
| Save original images | On  |

**Inline - Composing**

|                   |     |
|-------------------|-----|
| Inline Composing  | Off |
| Distortion Corr.  | On  |
| Mode              | 3D  |
| Unfiltered images | Off |

**Inline - MapIt**

|                      |           |
|----------------------|-----------|
| Save original images | On        |
| MapIt                | T1 map    |
| Flip angle 1         | 4 deg     |
| Flip angle 2         | 5 deg     |
| Measurements         | 1         |
| Contrasts            | 1         |
| TR                   | 5000.0 ms |
| TE                   | 2.9 ms    |

**Sequence - Part 1**

|                     |             |
|---------------------|-------------|
| Introduction        | On          |
| Dimension           | 3D          |
| Elliptical scanning | Off         |
| Reordering          | Linear      |
| Asymmetric echo     | Off         |
| Contrasts           | 1           |
| Flow comp.          | No          |
| Multi-slice mode    | Single shot |
| Echo spacing        | 6.9 ms      |
| Bandwidth           | 240 Hz/Px   |

**Sequence - Part 2**

|                         |          |
|-------------------------|----------|
| RF pulse type           | Fast     |
| Gradient mode           | Fast     |
| Excitation              | Non-sel. |
| RF spoiling             | On       |
| Incr. Gradient spoiling | Off      |
| Turbo factor            | 176      |

**Sequence - Special**

|                      |      |
|----------------------|------|
| Morphometry Analysis | On   |
| Skull Stripping      | Off  |
| Label Map            | On   |
| Deviation Map        | On   |
| Disease Class.       | On   |
| XML Export           | Off  |
| Uniform Image        | On   |
| Denoise Weighting    | 100  |
| Complex Div. Image   | Off  |
| Synthetic TI 0       | 0 ms |
| Synthetic TI 1       | 0 ms |
| New AC Mode          | Off  |
| IcePat               | Off  |
| Iter. Denoising      | Off  |
| FLAWS                | OFF  |

**Sequence - Special**

|                      |     |
|----------------------|-----|
| FID MoCo Logging     | Off |
| FID Phase Logging    | Off |
| FID Phase Correct    | Off |
| Ext. Inversion Pulse | Off |

**Sequence - Assistant**

|      |     |
|------|-----|
| Mode | Off |
|------|-----|
